# Supplementary material
Source: HighWire-hosted journal article supplement (https://erj.ersjournals.com/content/50/6/1702067)
Supplement: inline-supplementary-material-2 [file inline-supplementary-material-2.pdf]

To view the full contents of this document, you need a later version of the PDF viewer. You can upgrade to the latest version of Adobe Reader from [www.adobe.com/products/acrobat/readstep2.html](http://www.adobe.com/products/acrobat/readstep2.html)

For further support, go to [www.adobe.com/support/products/acrreader.html](http://www.adobe.com/support/products/acrreader.html)
